# Supplementary material
Source: JCI journal article supplement (doi:10.1172/jci200686)
Supplement: sd1 [file 1]

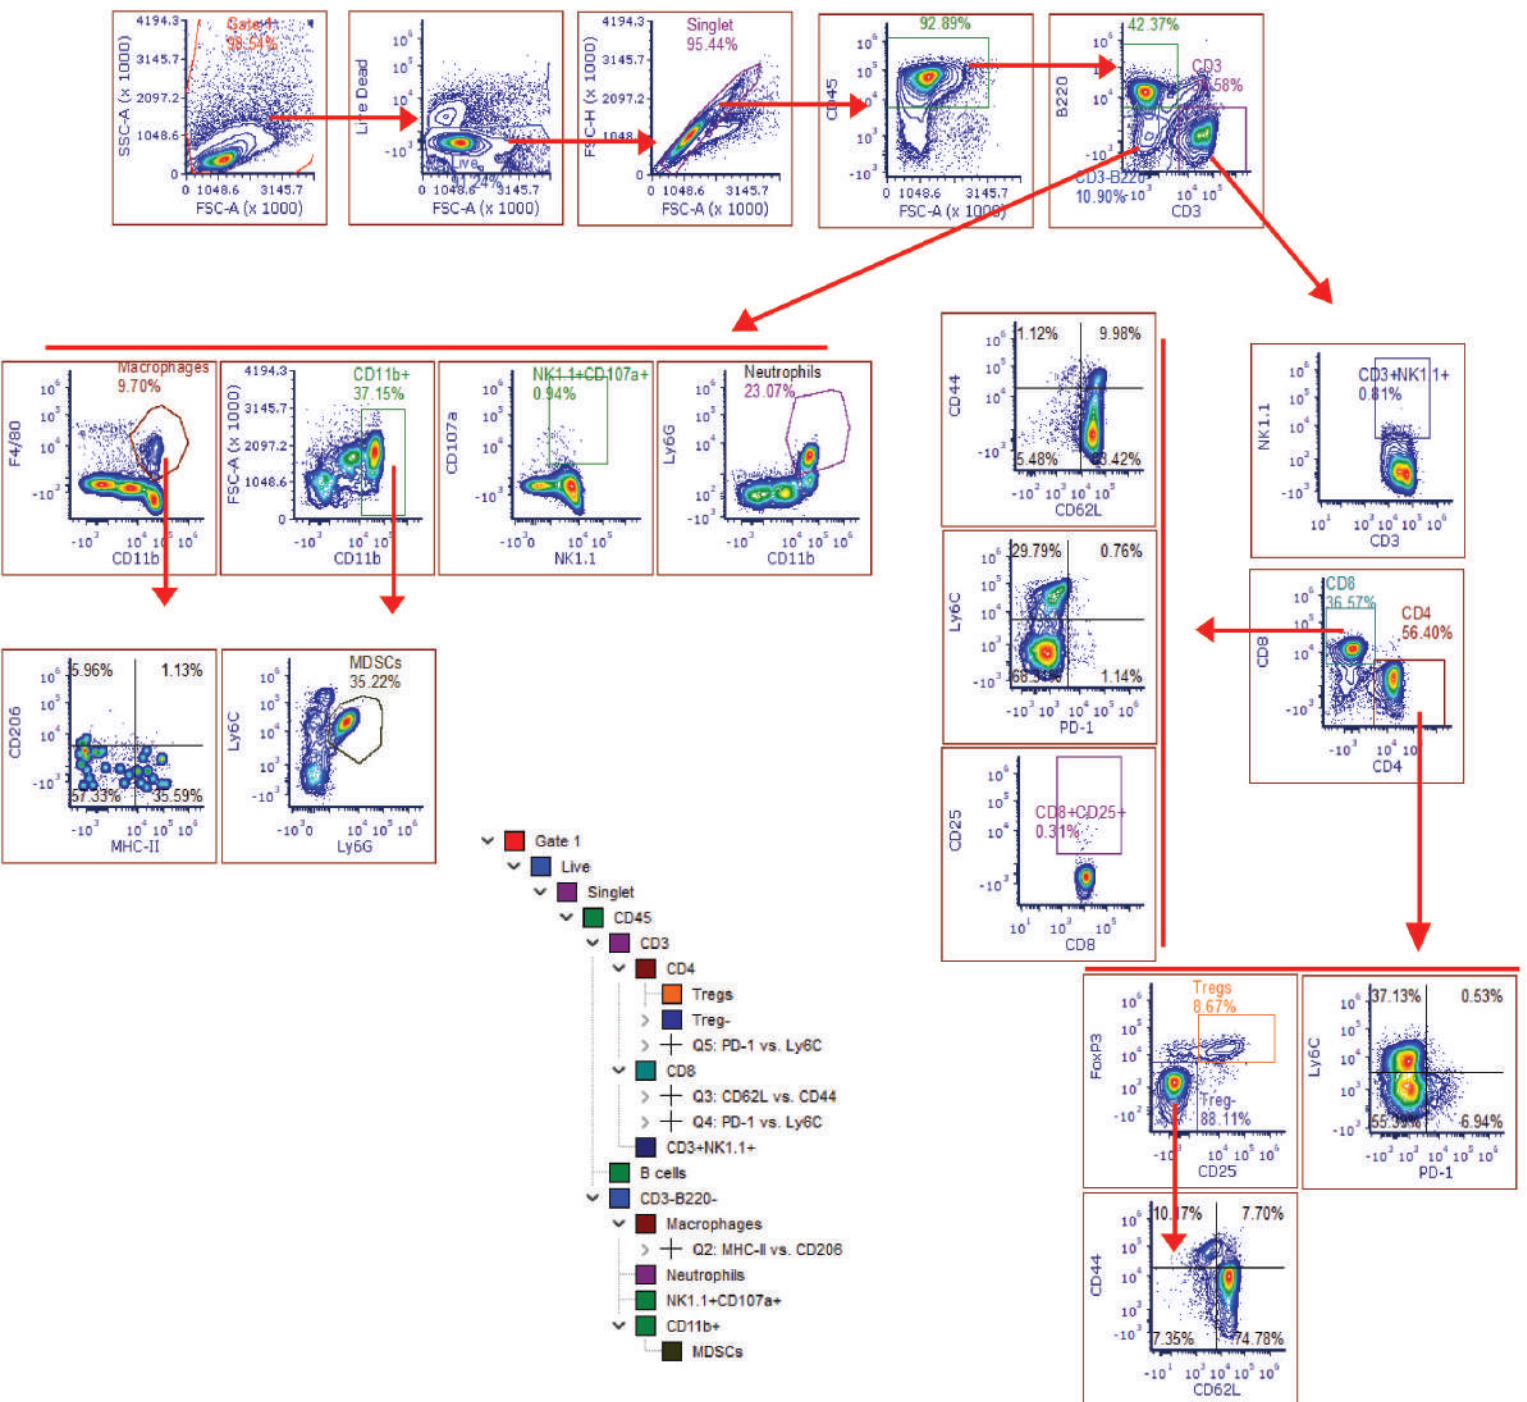

## Supplementary Figure S1

Flow cytometry gating strategy for immune cell profiling: Flow cytometry gating strategy for immune cell profiling. Single-cell suspensions were first gated on FSC-A vs SSC-A, followed by exclusion of dead cells using a viability dye. Live cells were gated for singlets (FSC-A vs FSC-H) and subsequently for CD45<sup>+</sup> leukocytes. From CD45<sup>+</sup> cells, T cells were identified as CD3<sup>+</sup> and further subdivided into CD4<sup>+</sup> and CD8<sup>+</sup> T cells. CD4<sup>+</sup> T cells were analyzed for regulatory T cells defined as CD4<sup>+</sup>CD25<sup>+</sup>FoxP3<sup>+</sup>, and expression of PD-1 and Ly6C where indicated. CD8<sup>+</sup> T cells were further characterized for activation/memory status using CD44 and CD62L, and PD-1 expression; a minor CD8<sup>+</sup>CD25<sup>+</sup> population is also shown. NK cells were identified as CD3<sup>+</sup>NK1.1<sup>+</sup> and assessed for degranulation by CD107a expression. B cells were defined as CD3-B220<sup>+</sup>. Myeloid cells were gated from the CD3-B220<sup>-</sup> fraction, with macrophages identified as CD11b<sup>+</sup>F4/80<sup>+</sup> and further characterized by MHC-II (M1) and CD206 (M2) expression. Neutrophils were defined as CD11b<sup>+</sup>Ly6G<sup>+</sup>, and myeloid-derived suppressor cells (MDSCs) as CD11b<sup>+</sup>Ly6G<sup>+</sup>Ly6C<sup>+</sup>.

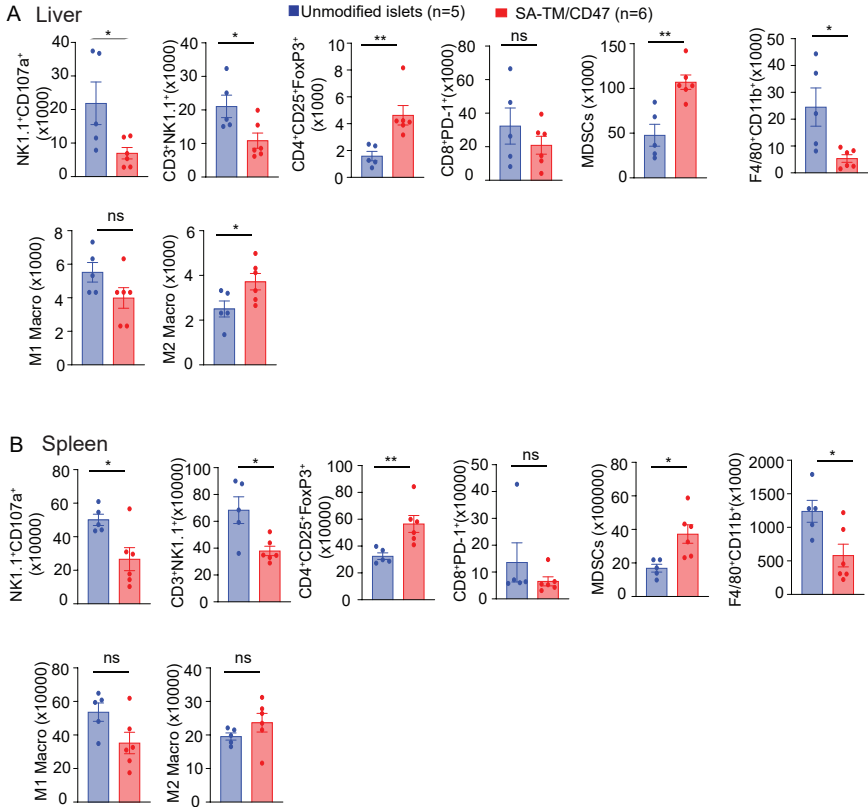

## Supplementary Figure S2

Supplementary Figure S2: Deep immunophenotyping shows tolerogenic immune response in mice transplanted with SA-TM/CD47-engineered allogenic islets. Diabetic C57BL/6 mice received intraportal transplants of 700 IEQ of either allogenic unmodified islets or islets co-engineered with SA-TM/CD47. At day 12 post-transplantation, immunophenotyping of graft-infiltrating and splenic immune cells demonstrated a predominantly tolerogenic immune response in the engineered islet group as absolute numbers. (A) Liver and (B) spleen immune cell composition was analyzed via flow cytometry. The data represent the absolute numbers of immune cells per tissue, shown as mean  $\pm$  SD from n=4-5 graft recipients. Statistical significance was determined using a one-tailed unpaired Student's t-test (\* $p < 0.05$ , \*\* $p < 0.01$ , \*\*\* $p < 0.001$ , \*\*\*\* $p < 0.0001$ ).

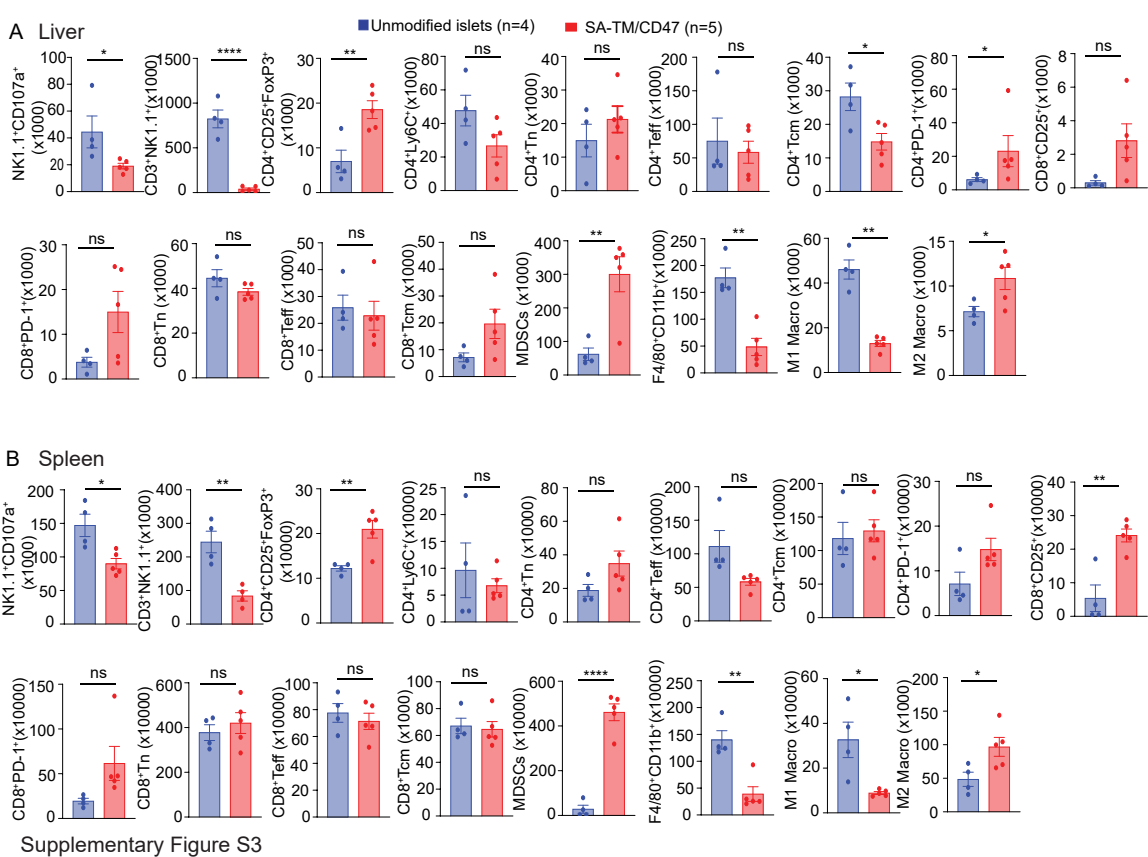

Supplementary Figure S3: Deep immunophenotyping shows tolerogenic immune response in mice transplanted with SA-TM/CD47-engineered allogeneic islets. Diabetic C57BL/6 mice received intraportal transplants of 700 IEQ of either allogeneic unmodified islets or islets co-engineered with SA-TM/CD47. At day 12 post-transplantation, immunophenotyping of graft-infiltrating and splenic immune cells demonstrated a predominantly tolerogenic immune response in the engineered islet group as absolute numbers. (A) Liver and (B) spleen immune cell composition was analyzed via flow cytometry. The data represent the absolute numbers of immune cells per tissue, shown as mean  $\pm$  SD from n=4-5 graft recipients. Statistical significance was determined using a one-tailed unpaired Student's t-test (\* $p < 0.05$ , \*\* $p < 0.01$ , \*\*\* $p < 0.001$ , \*\*\*\* $p < 0.0001$ ).

| S.N. | Antibody                                         | Host    | Clone       | Company            | Catalog No. | Lot No. | Dilution                  |
|------|--------------------------------------------------|---------|-------------|--------------------|-------------|---------|---------------------------|
| 1    | V500 Syrian Hamster anti mouse CD3e              | Hamster | 500A2       | BD Horizon         | 560771      | 8164558 | 1:50                      |
| 2    | BUV496 Anti-mouse CD4                            | Rat     | GK1.5       | BD Biosciences     | 612952      | 357490  | 1:200                     |
| 3    | BUV615-Anti-mouse CD5                            | Rat     | 53-7.5      | BD Biosciences     | 751298      | 1172962 | 1:200                     |
| 4    | SparkViolet538 Anti-mouseCD8                     | Rat     | QA17A07     | BioLegend          | 155019      | B329035 | 1:80                      |
| 5    | PerCP5.5 Anti-mouse-CD11b                        | Rat     | M1/70       | BD Pharmigen       | 550993      | 6112802 | 1:100                     |
| 6    | AF647 Anti-mouse CD11c                           | Hamster | N418        | BioLegend          | 117312      | B273696 | 1:100                     |
| 7    | BV570 Anti-mouse CD19                            | Rat     | 6D5         | BioLegend          | 115535      | B315920 | 1:50                      |
| 8    | PE/Cy5 Anti-mouse CD25                           | Rat     | PC61        | BioLegend          | 102010      | B320333 | 1:200                     |
| 9    | BB700 Anti-mouse CD44                            | Rat     | IM7         | BD Biosciences     | 566506      | 1050286 | 1:60                      |
| 10   | APC Fire810 Anti-mouse CD45                      | Rat     | 30-F11      | Biolegend          | 103174      | B335319 | 1:50                      |
| 11   | AF594 anti-mouse/human B220                      | Rat     | RA3-6B2     | BioLegend          | 103254      | B327137 | 1:200                     |
| 12   | BV711 Anti-mouse CD62L                           | Rat     | MEL-14      | BioLegend          | 104445      | B317393 | 1:400                     |
| 13   | APC Fire750 Anti-mouse CD80                      | Hamster | 16-10A1     | BioLegend          | 104740      | B310036 | 1:50                      |
| 14   | PerCP-eFluor 710-CD103                           | Hamster | 2.00E+07    | Fischer Scientific | 46-1031-82  | 2332024 | 1:50                      |
| 15   | PE/Cy7 Anti-mouse CD107a                         | Rat     | 1D4B        | BD Biosciences     | 560647      | 314075  | 1:800                     |
| 16   | BV785 Anti-mouse CD206                           | Rat     | C068C2      | BioLegend          | 141729      | B329080 | 1:100                     |
| 17   | APC Anti-mouse PD-1(CD279)                       | Rat     | 29F.1A12    | BioLegend          | 135210      | B307869 | 1:200                     |
| 18   | AF700Anti-mouse NK1.1                            | Mouse   | PK136       | BioLegend          | 108730      | B311346 | 1:800                     |
| 19   | BV605 Anti-mouse Ly6C                            | Rat     | HK1.4       | BioLegend          | 128036      | B266313 | 1:20                      |
| 20   | BUV395 Anti-mouse Ly6G                           | Rat     | 1A8         | BD Biosciences     | 563978      | 300815  | 1:100                     |
| 21   | Pacific Blue Anti-mouse F4/80                    | Rat     | BM8         | BioLegend          | 123124      | B280040 | 1:100                     |
| 22   | Spark Blue 550 Anti-mouse I-A/I-E(MHC-II)        | Rat     | M5/114.15.2 | BioLegend          | 107662      | B320821 | 1:50                      |
| 23   | BUV563 Anti-mouse $\gamma\delta$ T-Cell Receptor | Rat     | V65         | BD Biosciences     | 749464      | 1172963 | 1:20                      |
| 24   | BUV661, Anti-mouse CCR7                          | Rat     | 4B12        | BD Biosciences     | 741677      | 1214113 | 1:50                      |
| 26   | Alexa Fluor488-anti-mouse/rat-FoxP3              | Rat     | FJK-16s     | eBioscience        | 53-5773-82  | 2068006 | 1ul/10 <sup>6</sup> cells |
| 27   | BUV737 Rat Anti-Mouse CD335 (NKp46)              | Rat     | 29A1.4      | BD Biosciences     | 612805      | 1118991 | 1:30                      |

**Supplementary Table 1:** Antibodies used for flow cytometry. A comprehensive list of antibodies utilized for multi-color flow cytometry analyses in this study. The table provides details of antibody specificity, host species, clone designation, supplier, catalog and lot numbers, and working dilutions.
